# Supplementary material
Source: publisher figshare collection journal article supplement (https://gsajournals.figshare.com/ndownloader/files/21966462)
Supplement: Supplementary file 1 [file 21966462]

## Sheet: Sheet1
Analysis Type:	PANTHER Overrepresentation Test (Released 20190711)
Annotation Version and Release Date:	GO Ontology database Released 2019-12-09
Analyzed List:	Client Text Box Input (Caenorhabditis elegans)
Reference List:	Caenorhabditis elegans (all genes in database)
Test Type:	FISHER
Correction:	FDR
GO biological process complete	Caenorhabditis elegans - REFLIST (19961)	Client Text Box Input (348)	Client Text Box Input (expected)	Client Text Box Input (over/under)	Client Text Box Input (fold Enrichment)	Client Text Box Input (raw P-value)	Client Text Box Input (FDR)
DNA-dependent DNA replication (GO:0006261)	59	8	1.03	+	7.78	1.85e-05	0.0584
response to radiation (GO:0009314)	66	8	1.15	+	6.95	3.86e-05	0.0608
DNA replication (GO:0006260)	85	9	1.48	+	6.07	3.4e-05	0.0713
cell cycle (GO:0007049)	500	23	8.72	+	2.64	3.9e-05	0.0492
response to stress (GO:0006950)	975	39	17	+	2.29	2.43e-06	0.0153
